# Supplementary material for: Synthesis of a Co/Ni-MOF-74@PDI Z-scheme photocatalyst as a highly efficient photo-assisted Fenton-like catalyst for the removal of chlortetracycline hydrochloride
Source: Royal Society of Chemistry journal article supplement (doi:10.1039/d3dt01987j), 2023-01-01
Supplement: d3dt01987j1.pdf [file d3dt01987j1.pdf]

## Supporting Information

### **Synthesis of Co/Ni-MOF-74@PDI Z-scheme photocatalyst as a highly efficient photo-assisted Fenton-like catalyst for removal of chlortetracycline hydrochloride**

Qi Wen,<sup>a</sup> Di Li,<sup>\*a</sup> Chunyan Gao,<sup>a</sup> Yuhang Xue,<sup>a</sup> Lei Wu,<sup>a</sup> Fang Song<sup>b</sup> and Jun Zhou<sup>\*a</sup>

<sup>a</sup> School of Chemistry and Chemical Engineering, Xi'an University of Architecture and Technology, Xi'an, 710055, China

<sup>b</sup> Instrument Analysis Center of Xi'an University of Architecture and Technology, Xi'an University of Architecture and Technology, Xi'an, 710055, China

## Supplemental figures:

### 1. Adsorption-desorption isotherm and pore size distribution

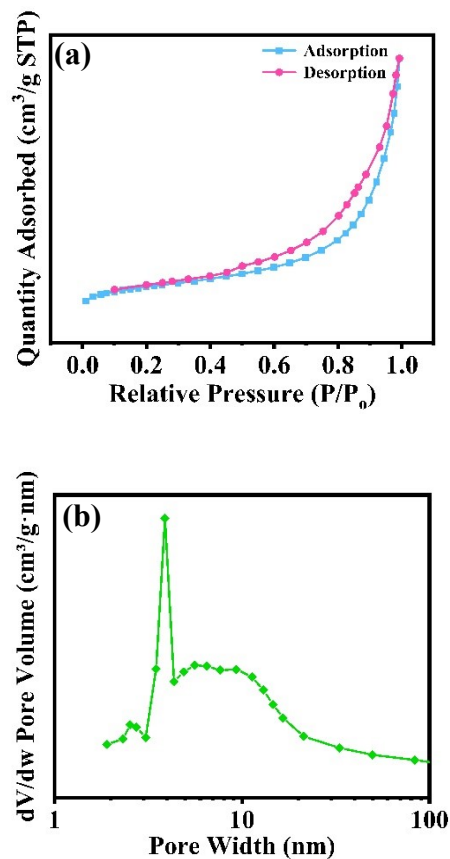

**Fig. S1** N<sub>2</sub> adsorption-desorption isotherms (a) and pore size distribution of CNPDI-2 (b).

### 2. Total organic carbon (TOC) results

$$\text{TOC removal} = \frac{\text{TOC}_i - \text{TOC}_f}{\text{TOC}_f} \times 100\% \quad (\text{S1})$$

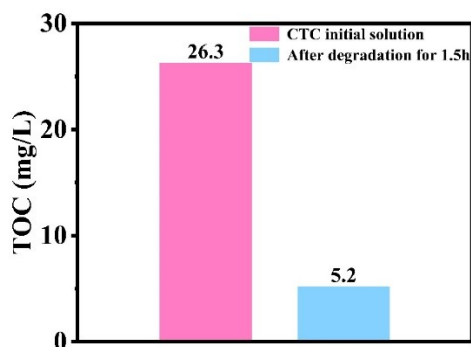

**Fig. S2** The total organic carbon (TOC) content of pure CTC solution and

CNPDI-2/H<sub>2</sub>O<sub>2</sub>/Vis solution after degradation for 90 min.

### 3. Effect of different ions on photodegradation

Reaction formula of CTC degradation in CNPDI-2/H<sub>2</sub>O<sub>2</sub>/Vis system after adding different ions:

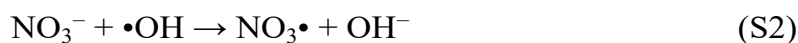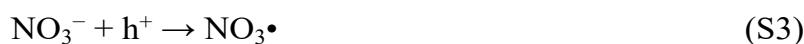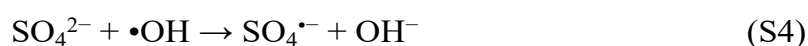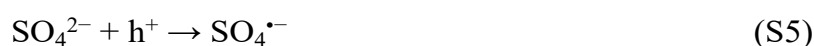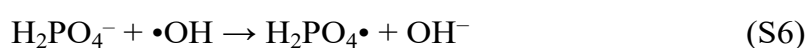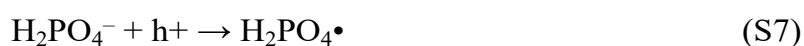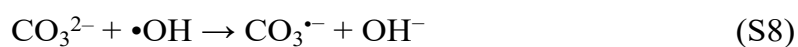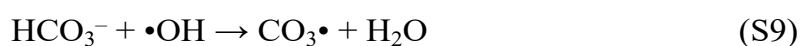

### 4. UPLC-MS

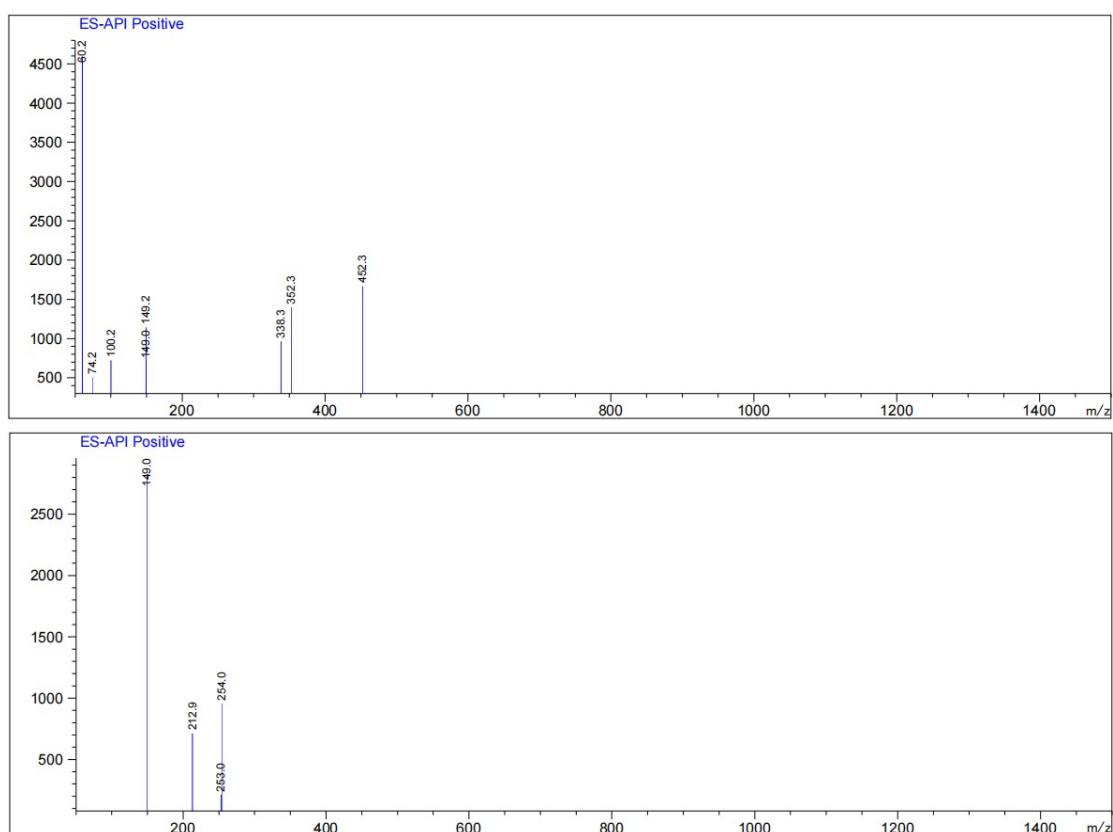

**Fig. S3** UPLC-MS results of doxycycline hydrochloride degradation products [CNPDI-2: 50 mg; H<sub>2</sub>O<sub>2</sub>: 19.6 mM; CTC: 40 mg/L].
